1 **The soursop genome and comparative genomics of basal angiosperms provide new insights on**  
2 **evolutionary incongruence**

3

4 **Authors:**

5 Joeri S. Strijk<sup>1,2,3,\*†</sup>, Damien D. Hinsinger<sup>2,3\*</sup>, Mareike M. Roeder<sup>4,5</sup>, Lars W. Chatrou<sup>6</sup>, Thomas L. P.  
6 Couvreur<sup>7</sup>, Roy H. J. Erkens<sup>8</sup>, Hervé Sauquet<sup>9</sup>, Michael D. Pirie<sup>10,11</sup>, Daniel C. Thomas<sup>12</sup>, Kunfang Cao<sup>1</sup>

7

8 **Author affiliations:**

- 9 <sup>1</sup> State Key Laboratory for Conservation and Utilization of Subtropical Agro-bioresources, Guangxi  
10 University, Nanning, Guangxi, China
- 11 <sup>2</sup> Biodiversity Genomics Team, Plant Ecophysiology & Evolution Group, Guangxi Key Laboratory of Forest  
12 Ecology and Conservation, College of Forestry, DaXueDongLu 100, Nanning, Guangxi, China
- 13 <sup>3</sup> Alliance for Conservation Tree Genomics, Pha Tad Ke Botanical Garden, PO Box 959, 06000 Luang  
14 Prabang, Laos
- 15 <sup>4</sup> Community Ecology and Conservation Group, Xishuangbanna Tropical Botanical Garden, Chinese  
16 Academy of Sciences, Menglun, Mengla, Yunnan, PR China
- 17 <sup>5</sup> Aueninstitut, Institute for Geography and Geoecology, Karlsruhe Institute of Technology, Josefstraße 1,  
18 76437 Rastatt, Germany
- 19 <sup>6</sup> Ghent University, Systematic and Evolutionary Botany lab, K.L. Ledeganckstraat 35, 9000 Ghent, Belgium
- 20 <sup>7</sup> IRD, DIADE, Univ Montpellier, Montpellier, France
- 21 <sup>8</sup> Maastricht Science Programme, Maastricht University, P.O.Box 616, 6200 MD, Maastricht, The  
22 Netherlands
- 23 <sup>9</sup> National Herbarium of New South Wales (NSW), Royal Botanic Gardens and Domain Trust, Sydney,  
24 Australia
- 25 <sup>10</sup> Institute of Organismic and Molecular Evolution, Johannes Gutenberg University of Mainz, Anselm-  
26 Franz-von-Bentzelweg 9a, 55099 Mainz, Germany
- 27 <sup>11</sup> University Museum, University of Bergen, Postboks 7800, N-5020 BERGEN
- 28 <sup>12</sup> National Parks Board, Singapore Botanic Gardens, 1 Cluny Road, Singapore, 259569, Singapore
- 29
- 30 † **Corresponding author:** [jsstrijk@hotmail.com](mailto:jsstrijk@hotmail.com)
- 31 \* Authors contributed equally
- 32
- 33 **Keywords:**
- 34 High Quality Draft Genome, Basal Angiosperms, magnoliids, Eudicots, Monocots, Multispecies Coalescent,  
35 Genomic Architecture, Comparative Genomics

36 **Abstract**

37 Deep relationships and the sequence of divergence among major lineages of angiosperms (magnoliids,  
38 monocots and eudicots) remain ambiguous and differ depending on analytical approaches and datasets used.  
39 Complete genomes potentially provide opportunities to resolve these uncertainties, but two recently  
40 published magnoliid genomes instead deliver further conflicting signals. To disentangle key angiosperm  
41 relationships, we report a high-quality draft genome for the soursop (*Annona muricata*, Annonaceae). We  
42 reconstructed phylogenomic trees and show that the soursop represents a genomic mosaic supporting  
43 different histories, with scaffolds almost exclusively supporting single topologies. However, coalescent  
44 methods and a majority of genes support magnoliids as sister to monocots and eudicots, where previous  
45 whole genome-based studies remained inconclusive. This result is clear and consistent with recent studies  
46 using plastomes. The soursop genome highlights the need for more early diverging angiosperm genomes and  
47 critical assessment of the suitability of such genomes for inferring evolutionary history.

## 48 **Introduction**

49 Reconstructing the sequence of rapid speciation events in deep time is a major challenge in evolutionary  
50 inference. Bursts of diversification result in short branches within phylogenetic trees and the persistence of  
51 discrepancies between histories of individual genes, genomes and the underlying species tree (Oliver et al.  
52 2013). These phenomena are prevalent across the Tree of Life, including the origin of important, species-rich  
53 lineages such as tetrapods (Song et al. 2012; Jarvis et al. 2014), insects (Freitas et al. 2018), and flowering  
54 plants (Tank et al. 2015). Whole genome sequencing and application of the multispecies coalescent offer a  
55 new, unprecedented opportunity to reconstruct such recalcitrant relationships (Edwards 2009; Edwards et al.  
56 2016).

57 The emergence of flowering plants (angiosperms) was a geologically sudden and ecologically transformative  
58 event in the history of life. Recent analyses have suggested that the major angiosperm clades diverged in  
59 quick succession within the Cretaceous, with monocots, magnoliids and eudicots starting to diversify within  
60 ca 5 Ma (Sauquet and Magallón 2018).

61 Despite steady progress in the reconstruction of angiosperm phylogeny and evolution<sup>eg. 6</sup>, deeper nodes have  
62 proven notoriously difficult to resolve, in particular the relationships between *Ceratophyllum*,  
63 Chloranthaceae, monocots, magnoliids, and eudicots (Ruhfel et al. 2014; Wickett et al. 2014; Zeng et al.  
64 2014).

65 Potential relationships among the main angiosperms lineages can be summarized as either 1) magnoliids  
66 sister to eudicots + monocots (Moore et al. 2010; Qiu et al. 2010; Soltis et al. 2011; Zhang et al. 2012;  
67 Magallón et al. 2015); 2) magnoliids sister to eudicots (Bell et al. 2010; Moore et al. 2011; Zeng et al. 2014);  
68 or 3) magnoliids sister to monocots (Nickrent and Soltis 2006). Each of these topologies were inferred from  
69 organelles (chloroplast and mitochondrial loci) and/or nuclear datasets, with variable levels of support  
70 depending the analytical method and taxonomic sampling used. In parallel, recently published studies  
71 challenge our understanding of the early evolution of angiosperms. Reconstruction of the ancestral  
72 angiosperm genome shows a reduction in the number of chromosomes between the divergence of the  
73 putative sister taxa of all remaining angiosperms *Amborella* and the most recent common ancestor (MRCA)  
74 of eudicots (Murat et al. 2017). In addition to this assessment of early angiosperm genomic features, Sauquet  
75 *et al.* (Sauquet et al. 2017) suggested that the early evolution of angiosperm flowers was marked by  
76 successive reductions in the number of whorls of both the perianth and the androecium. In both cases,  
77 disparate reductions may have paved the way for the evolution of clade specific features of genomes and  
78 flower morphology in contemporary clades.

79 Since the publication of the first plant genome, that of *Arabidopsis thaliana* (Initiative 2000), there has been  
80 a steady increase in the number of sequenced eudicot and monocot genomes. However, with the exception of  
81 the iconic *Amborella trichopoda*, basal angiosperm diversity represented by the ancient lineages of  
82 Nymphaeales, Austrobaileyales, Chloranthales, and magnoliids has largely been overlooked. After eudicots  
83 and monocots, Magnoliidae are the most diverse clade of angiosperms (Massoni et al. 2014) with 9,000-  
84 10,000 species in four orders (Canellales, Piperales, Laurales and Magnoliales). However, despite this  
85 diversity and economic value (e.g. avocado, black pepper, cinnamon, soursop), only two genomes have been

86 published to date (Chaw et al. 2019; Chen et al. 2019). Analysis of such genomic data was expected to  
87 resolve the still unclear relationships of magnoliids with the rest of angiosperms (Soltis and Soltis 2019).  
88 However, the results strongly disagreed on the position of magnoliids, supporting either a sister relationship  
89 to eudicots and monocots (Chen et al. 2019), or to eudicots alone (Chaw et al. 2019). This disagreement  
90 could be an analytical artefact caused by whole genome duplication (WGD) and chromosomal  
91 rearrangements as apparent in both *Liriodendron chinense* (the Chinese tulip poplar) and *Cinnamomum*  
92 *kanehirae* (the stout camphor tree) after their divergence from monocots or eudicots. More magnoliid  
93 genomes and critical assessment of the potential for such phenomena to impact phylogenetic inference is  
94 needed to break the impasse.

95 We sequenced the genome of *Annona muricata* (the soursop) which is one of the c. 2450 species of the  
96 custard apple family (Annonaceae) (Rainer and Chatrou 2014), the second most species rich family of  
97 magnoliids (Chatrou et al. 2012). Its species are frequent components of tropical rain forests worldwide  
98 (Gentry 1993; Tchouto et al. 2006; Punyasena et al. 2008; Sonké and Couvreur 2014). Widely known  
99 examples include ylang-ylang (*Cananga odorata*), used for its essential oils, and species of the Neotropical  
100 genus *Annona*, such as the soursop, cultivated for their edible fruits. We then undertook comparative  
101 intergenomic analyses in magnoliids, reconstructed the relationships among the three major lineages of  
102 angiosperms and explored the gene tree incongruence patterns during early angiosperm diversification.

103

## 104 **Results**

105 To assemble the genome of the soursop, we extracted DNA from a soursop tree (*Annona muricata*) grown in  
106 Xishuangbanna Tropical Botanical Garden (XTBG, Menglun, China), and generated 131.43 (164.47x) and  
107 36.95 Gb (46.24x) of Illumina and PacBio reads, respectively (Supplementary Table 1). SOAPdenovo 2.04  
108 was used to assemble the first draft of the genome, reaching a contig N50 of approximately 700 kb.

109 The soursop assembly was further refined using both 10X Genomics data (180.04 Gb – 225.30x) and  
110 Bionano optical mapping data (95.9 Gb – 120.01x) (Supplementary Table 1) to improve the scaffold N50 to  
111 3.4 Mb, the longest scaffold being 20.46 Mb (GC content of 34.35%, Supplementary Table 2). The total  
112 assembly length of the soursop genome was 656.78Mb (scaffold assembly). Scaffolds longer than 100kb  
113 totaled 646.64Mb (98.45% of the total length). This level of contiguity is similar to the one obtained in  
114 *Liriodendron chinensis* (N50=3.5 Mb (Chen et al. 2019)) but smaller than obtained in *Cinnamomum*  
115 *kanehirae* (N50=50.4Mb after Hi-C scaffolding (Chaw et al. 2019), and better than other genomes assembled  
116 at scaffold-level (e.g. (Yang et al. 2018; Arimoto et al. 2019; Zhang et al. 2019)). A total of 444.32 Gb of data  
117 were produced using Illumina, PacBio, 10X Genomics and Bionano technologies, corresponding to 556x  
118 coverage of the soursop genome. We assessed the quality of the soursop genome assembly by mapping back  
119 the Illumina reads against the assembly. A total of 97.16% reads can be mapped, covering >99.92% of the  
120 genome, excluding gaps. 99.81% of the genome was covered with a depth >20x, which guaranteed the high  
121 accuracy of the assembly for SNPs detection (Supplementary Table 3). The final assembly comprised 949  
122 scaffolds, 29 greater than 5Mb in length. SNP calling on the final assembly yielded a heterozygosity rate of  
123 0.032%, lower than 0.08% as estimated by the K-mer analysis (Supplementary Fig. 1).

124 Repeats accounted for 54.87% of the genome (Supplementary Table 4, Fig. 1b) and were masked for genome  
125 annotation. It is slightly less than in *Cinnamomum* (Lauraceae, 48%) and *Liriodendron* (Magnoliaceae,  
126 61.64%). Long Terminal Repeat (LTR) retrotransposons were the most abundant, representing 41.28% of the  
127 genome (56.25% in *L. chinense*), followed by DNA repeats (7.29%). The stout camphor tree genome  
128 exhibited a different balance between types, with LTR (25.53%) and DNA transposable elements (12.67%)  
129 being less dominant. No significant recent accumulation of LTRs and LINEs was found in the interspersed  
130 repeat landscape, but a concordant accumulation around 40 units was detected (Fig. 1c). Assuming a  
131 substitution rate similar to the one found in *Liriodendron* ( $1.51 \times 10^{-9}$  subst./site/year), we estimate this burst  
132 of transposable elements to have occurred 130-150 Ma ago. By far the main contributor to this old expansion  
133 of repeat copy-numbers were the LTRs, with an increase of up-to approximately 1% at 42 units.

134 Genes were annotated using a comprehensive strategy combining *ab initio* prediction with protein homology  
135 detection and transcriptomic data from leaves, flowers, bark and both young and ripening fruits  
136 (Supplementary Table 1). We combined the gene models predicted by these three approaches in  
137 EvidenceModeler v1.1.1 (EVM) to remove the redundant gene structures and filtered the resulting gene  
138 models by removing (1) the coding regions  $\leq 150$ bp and (2) models supported only by *ab initio* methods and  
139 with FPKM $<1$ . We identified 23,375 genes and 21,036 genes supported by at least two methods  
140 (Supplementary Fig. 3), with an average coding-region length of 1.1 kb and 4.79 exons per gene, similar to  
141 other angiosperms (Supplementary Table 5). 22,769 (97.4%) of these genes were annotated through  
142 SwissProt and TrEMBL and GO-terms were retrieved for 20,595 (88.1%) genes (Supplementary Table 6).

143 We assessed both the quality of our gene predictions and completeness of our assembly using BUSCO and  
144 CEGMA approaches. 231 CEGs genes (93.15%) and 899 (94%) of the BUSCO orthologous single copy  
145 genes were retrieved from the soursop assembly (Supplementary Table 7).

146 We determined *A. muricata* exhibits heterozygous and homozygous SNP ratios of 0.0032% and 0.0001%,  
147 respectively. This very low heterozygosity, usually found in cultivated species that experienced strong  
148 bottlenecks during domestication (Eyre-Walker et al. 1998; Doebley et al. 2006; Zhu et al. 2007), was not  
149 due to an intense, recent decrease in population size, as shown by our PSMC analysis. Instead, the very low  
150 heterozygosity observed in soursop was rather due to a slow and regular reduction of the species population  
151 sizes (Fig. 1a).

152 By assembling transcriptomes from several organs, in addition to homology-based prediction and *de novo*  
153 predictions, we identified 21,036 genes supported by at least two methods (Supplementary Fig. 3). We  
154 assessed both the quality of our gene predictions and completeness of our assembly using BUSCO and  
155 CEGMA approaches. 231 CEGs genes (93.15%) and 899 (94%) of the BUSCO orthologous single copy  
156 genes were retrieved from the soursop assembly (Supplementary Table 7).

157 To infer phylogenetic relationships among major clades of angiosperms, we compared the soursop genome  
158 with the genomes of eleven other species. We included *Amborella trichopoda*, the putative sister lineage to  
159 all extant angiosperms, selected representatives from monocots (*Oryza sativa*, *Musa acuminata*), and key  
160 lineages of eudicots, including Ranunculales (*Aquilegia coerulea*), Proteales (*Nelumbo nucifera*), superrosids  
161 (*Vitis vinifera*, *Quercus robur*, *Arabidopsis thaliana*), and superasterids (*Amaranthus hypochondriacus*,

162 *Helianthus annuus*, *Coffea canephora*). We used *all-against-all* protein sequence similarity searches with  
163 OrthoMCL to identify 398,668 orthologs with at least one representative in angiosperms. 672 of these were  
164 unique to *A. muricata* and 8,614 were found to be shared with four species representative of other main  
165 lineages of angiosperms (see Fig. 1d).

166 To investigate patterns of incongruence and support in the reconstructed phylogeny of the main angiosperms  
167 lineages, we focused on testing three main hypotheses and corresponding topologies: 1) magnoliids sister to  
168 eudicots + monocots [(*Annona*, (eudicots, monocots), hereafter referred to as *SAT*]; 2) magnoliids sister to  
169 eudicots [(monocots, (*Annona*, eudicots)), *SMT*]; and 3) magnoliids sister to monocots [(eudicots, (*Annona*,  
170 monocots), *SET*].

171 We assessed conflicting signals in the genome of the soursop (Fig. 2), using three dataset. Firstly, we used a  
172 set of 2426 orthologs identified in the quartet (*Annona muricata*, *Arabidopsis thaliana*, *Amborella*  
173 *trichopoda* and *Oryza sativa*), maximising the number of loci. Secondly, a set of 689 orthologs identified in  
174 the 12 species was used for comparative analyses as described above, maximizing the number of species.  
175 Finally, a set of 1578 orthologs identified in the previous quartet, plus *Cinnamomum kanehirae* and  
176 *Liriodendron chinense*, was used maximizing the magnoliid representation.

177 Using the set of 2426 orthologs and single-gene ML phylogenetic reconstructions, we show that the *SMT*  
178 topology found using *Cinnamomum* as a representative of magnoliids, is only supported by ~16.8 % of the  
179 genes (29) with a clear evolutionary signal (SH-like values >0.95 for one topology) (*SET*: 16.27% - 28  
180 genes; *SAT*: 66.9% - 115 genes). When taking into account the slightly weaker phylogenetic signal (SH-like  
181 values >0.70), the majority (54.3 %) of the 1228 genes supported *SAT* (*SET*: 23%; *SMT*: 22.5%)  
182 (Supplementary Table 8). Assuming gene tree differences are the result of coalescent stochasticity, we  
183 performed coalescence-based analyses (*STAR*, *NJst*, *MP-EST*, *ASTRAL-III*) of the three datasets to  
184 reconstruct a species tree (Supplementary Fig. 4). Using 689 loci (12 taxa), all three coalescent methods  
185 (*STAR*, *NJst*, *MP-EST*) retrieved a *SET* topology, whereas both the 2426 loci (4 representative taxa) and the  
186 1578 loci dataset (4 representative taxa + 2 published magnoliids) dataset retrieved a *SAT* topology.  
187 Interestingly, in both the 689 and 2426 loci datasets, the branch supporting the position of *Annona* in the trio  
188 *Annona*-monocots-eudicots is very short (Supplementary Fig. 4), suggesting that divergence of the major  
189 clades occurred within a short time frame.

190 The rise of angiosperms during the Cretaceous was likely triggered by their interaction with pollinators and  
191 the early onset of morphological adaptations in the group (e.g. reproductive and vegetative parts)<sup>20</sup>,  
192 suggesting that the underlying molecular functions (such as those linked to flowering processes or adaptation  
193 to insect herbivory) could have quickly diversified in response, and could thus reflect diversification patterns  
194 and ecological adaptation, instead of phylogeny. To identify potential functions triggering bias in the  
195 evolutionary signal contained in the soursop genome, we compared the GO-terms annotations for molecular  
196 functions in the genes supporting the different topologies (SH-like support >0.95) highlighting different  
197 trends in functional annotations according to the topology they supported (P-value < 0.001, Friedman rank  
198 sum test, see Supplementary Fig. 5). Briefly, differences among topologies were significant only for  
199 Catalytic Activity (p<0.005, Kruskal-Wallis rank sum test) and Receptor Activity (p<0.05). We found the



200 “Receptor activity” genes were over-represented ( $p < 0.005$ ) in the SMT topology (when considering genes  
201 giving topologies without support ( $0 < SH < 50$ ) relative to the background.

202 To investigate the genomic landscape of incongruent phylogenetic signals, we compared scaffold features in  
203 terms of ortholog number and density (Supplementary Fig. 6) for the 2426 loci dataset. The 181 scaffold  
204 containing orthologs (19%) included an average of  $\sim 22$  orthologous coding regions (max=799, found in the  
205 scaffold\_1, see Supplementary Table 10), with a density of  $1.33 \times 10^{-2}$  orthologs per kb. No correlation was  
206 found between the length of the scaffold and the proportion of genes supporting a given topology  
207 (Supplementary Fig. 6), excluding a potential bias toward a given topology during assembly. However, the  
208 median of the proportion of genes in a scaffold supporting the SAT was close to 23%, instead of 4% for both  
209 the SMT and SET (Supplementary Fig. 7, box plots). Considering a given topology, density was one or two  
210 orders of magnitude lower, the genes supporting the SET, the SMT and SAT hypotheses being found with  
211 densities of  $5.09 \times 10^{-4}$ ,  $2.13 \times 10^{-3}$  and  $6.34 \times 10^{-4}$  genes per kb, respectively. Compared to the density of all  
212 orthologs found in each scaffold (aka “the background”), the highest relative density was found in the genes  
213 supporting the SAT ( $\frac{1}{4}$  of the background density), followed by the SMT and SET hypotheses, with 13.9%  
214 and 10.6% respectively. We generated heatmaps of the occurrences of orthologs and showed that distribution  
215 of orthologs is uneven across scaffolds: scaffolds rich in orthologs supporting a given topology did not  
216 contain a significant number of orthologs supporting a conflicting topology (Supplementary Fig. 6). Most of  
217 the scaffolds contained few orthologs supporting a given topology (Supplementary Fig. 6a), with only a few  
218 scaffolds showing a high topology-supporting ortholog density (Supplementary Fig. 6b). Altogether, our  
219 results strongly support the magnoliids as sister to a clade containing (eudicots+monocots), i.e. the SAT  
220 topology (Fig. 3).

221 Comparing gene content in *Annona* with that found in the stout camphor tree, we found a striking difference  
222 in diversity of resistance genes. Of 387 resistance genes in *Cinnamomum*, 82% were nucleotide-binding site  
223 leucine-rich repeat (NBS-LRR) or with a putative coiled-coil domain (CC-NBS-LRR). By contrast, the  
224 soursop genome contains a similar number of resistance genes (301 annotations), but only 0.66% (2 genes)  
225 of them are NBS-LRR or CC-NBS-LRR genes. These results suggest the presence of different evolutionary  
226 strategies within magnoliids with respect to pathogen resistance. We explore the expansion of gene families  
227 in magnoliid lineages by adding *Cinnamomum* and *Liriodendron* to the quartet (*Annona muricata*,  
228 *Arabidopsis thaliana*, *Amborella trichopoda* and *Oryza sativa*) (Fig. 1e). GO-terms from annotations of these  
229 gene families show that the lineage of *Annona* experienced a fast expansion of both the MAD1 protein  
230 family (+6 copies, involved in flowering time -GO:0009908- and cold adaptation -GO:0009409), and  
231 metabolism through mitochondrial fission (GO:0000266), regulation of transcription (GO:0006383,  
232 GO:0006366, GO:0045892) and organism development (GO:0007275). Half of the expanded gene families  
233 with annotations in the branch of Magnoliales (*Liriodendron*, *Annona*) were involved in disease or pathogens  
234 resistance. On the contrary, gene families experiencing fast expansion on the magnoliids branch  
235 (*Liriodendron*, *Annona*), *Cinnamomum*) were mainly involved in growth function, like cell wall biogenesis  
236 (GO:0042546), membrane fission (GO:0090148) and metabolism of peptides (GO:0006518), proteins  
237 (GO:0046777) or mitosis cytokinesis (GO:0000281). Notably, gene family expansion is consistently lower

238 along internal branches (approximately 1/10<sup>th</sup> of the gene family expansion is found on their sister branches).  
239 Whole genome duplications (WGD) are suspected to be a significant trigger factor in the diversification of  
240 angiosperms (Tank et al, 2015; Vamosi et al, 2018). Ks distribution of both the soursop paralogs  
241 (Supplementary Fig. 2a) and synteny analysis using i-adhore 3.0 and SynMap as implemented in CoGe  
242 (Lyons & Freeling, 2008; Lyons et al., 2008) did not reveal any obvious pattern of recent tandem- or whole-  
243 genome duplication. However, an old duplication (around 1.5 Ks units) was found in the soursop genome.  
244 This contrasts with recent studies in magnoliids (Chaw et al. 2019; Chen et al. 2019), where the authors  
245 found WGD with lower Ks values (thus potentially more recent), and hypothesized them to be shared in  
246 magnoliids and thus older than the divergence between Lauraceae and Magnoliaceae.

247 In order to assess whether the events identified in *Cinnamomum* and *Liriodendron* correspond to a  
248 magnoliids-shared WGD, or to independent events, we compared the syntenic graph of *Arabidopsis* and each  
249 of the magnoliid genomes. In each magnoliid genome, we found evidence of duplicated syntenic blocks  
250 (stronger in *Liriodendron*, but inconclusive in *Cinnamomum* depending on whether one or two WGD  
251 occurred).

252 We evaluated the distribution of gene copy numbers among magnoliids for gene families with only one copy  
253 in *Amborella* (i.e. the number of copies found in each magnoliid for gene families in which *Amborella* has  
254 only one copy) . We found that despite a WGD event reported in *Liriodendron* and two in *Cinnamomum*,  
255 only the former displayed two gene copies for the majority of the gene families, with *Annona* holding one  
256 gene copy for almost all families (Fig. 1f). Conversely, *Annona* and *Cinnamomum* contained only one copy  
257 of almost all the gene families for which *Liriodendron* contains two copies (i.e. the gene families that show a  
258 WGD signal, Fig. 1g). For gene families in which only one copy was found in both *Amborella* and  
259 *Cinnamomum*, both *Annona* and *Liriodendron* showed a similar pattern of mainly unique orthologs families,  
260 with about half of the families being duplicated in both species (Fig. 1h). However, the ratio  
261 duplicated/unique occurrence in orthogroups was smaller in *Annona* (0.43) than in *Liriodendron* (0.58),  
262 suggesting a shared ancestral WGD in magnoliids. We used MCscan to detect syntenic regions in magnoliids  
263 and *Amborella*, and detected large one-copy portions of the genome in *Amborella* occurring as duplicates in  
264 *Liriodendron*, as expected from the previous studies (Chen et al. 2019) and our results above. More  
265 surprisingly, duplicated syntenic regions in *Cinnamomum* showed evidence for two rounds of WGD (i.e. four  
266 copies of a single *Amborella* syntenic region), in contradiction with our results above, but according to  
267 previous studies. However, after careful evaluation of the synteny graphs, we found limited evidence (i.e.  
268 few/shorter duplicated syntenic regions) of WGD in the genome of the soursop compared to *Amborella*. To  
269 characterize more precisely the ages and distributions of these duplication events, we analyzed the Ks  
270 distribution curves for the paranomes (i.e. the complete set of paralogs in a genome) of the soursop and the  
271 two published magnoliids. We used WGD because it has been shown that node-averaged histograms are  
272 more accurate than weighted ones to infer ancient WGD (Tiley et al. 2018).

273 Contrary to other magnoliids, the paranome of the soursop (Supplementary Fig. 2a) did not show the usual  
274 acute peak corresponding to newly duplicated genes that are continuously generated by small scale  
275 duplications events (e.g. tandem duplications), but showed an older small scale duplication event peak. No



276 realistic Gaussian mixture model (i.e. implying <4 WGD) was selected by either the BIC or AIC criterion,  
277 but the  $\Delta_{\text{BIC}}$  and  $\Delta_{\text{AIC}}$  favored 2 component models for *Annona* and *Cinnamomum*, with a less clear signal in  
278 *Liriodendron* (Supplementary Fig. 2a,b,c). In addition to the standard GMM method, we also used the  
279 BGMM method and confirmed that fitting more complex Gaussian models only resulted in components of  
280 negligible weights (results not shown). Considering two components for *Annona* and *Liriodendron*, and two-  
281 three components for *Cinnamomum* (as indicated by the results above), the main peak in *Annona* was found  
282 around 1.3-1.5 Ks units, whereas it occurred around 0.8 Ks units (two components) or 0.4 and 1.3-1.4 Ks  
283 units (three components) in *Cinnamomum* (partially comparable - for the two components - with results from  
284 previous studies (Chaw et al. 2019), as we did not identify a peak at 0.76). Notably, the oldest peak in  
285 *Cinnamomum* located approximately at the same divergence as the peak in *Annona*, suggesting a potentially  
286 shared WGD. We identified a peak at 0.6 Ks units in *Liriodendron*, compatible with the location of the  
287 youngest peak in *Cinnamomum*, but younger than previously inferred (Chen et al. 2019). Considering the  
288 divergence of paralogs in each of the magnoliids, it seems unlikely that they share a common WGD event.  
289 Indeed, the pattern of potentially shared WGD (*Annona*+*Cinnamomum* ~1.5 Ks units; *Liriodendron* +  
290 *Cinnamomum* ~0.5 Ks units) seems incompatible with both the current and our reconstructed hypothesis of  
291 magnoliids evolution.

292 By performing one-vs-one ortholog comparisons in magnoliids, we found that the divergence of the *Annona*  
293 and *Liriodendron* lineage occurred around 0.6-0.7 Ks units (Supplementary Fig. 2d), while the divergence  
294 between Magnoliales and Laurales appeared to be slightly older at 1.0-1.1 Ks units (Supplementary Fig. 2e).  
295 The divergence of magnoliids (represented by *Annona*) from *Amborella* took place at 1.8-1.9 Ks units  
296 (Supplementary Fig. 2f). This confirms the likely absence of a shared WGD in magnoliids, and places the  
297 WGD events observed in both *Cinnamomum* and *Liriodendron* subsequent to their MRCA with *Annona*.

298

## 299 **Discussion**

300 Increasing availability of high quality genome assemblies enables far greater insight into challenging  
301 phylogenetic problems, like ancient and rapid diversification events, as epitomised by the early evolutionary  
302 history of angiosperms. The soursop genome provides evidence for the rapid sequential divergence of  
303 magnoliids, monocots and eudicots, with a mosaic of phylogenetic signals across the genome reflecting  
304 coalescence and potentially hybridisation between closely related ancestral lineages. This was followed by  
305 relative structural stasis since the Jurassic-Cretaceous boundary, with none or very few ongoing small scale  
306 duplications, fewer paralogs than other magnoliids, no significant burst of transposable elements and few  
307 expanded gene families along the branches leading to *Annona*. To our knowledge, the soursop is the first  
308 nuclear genome displaying such extensive signs of “fossilization” [notwithstanding the mitochondrial  
309 genome of *Liriodendron tulipifera* which has been also described as “fossilized” (Richardson et al. 2013)]. A  
310 genome which has retained the original characteristics of the ancestral magnoliid lineage, will be an  
311 invaluable resource for future studies on angiosperm early diversification. The apparent stability of the  
312 *Annona* genome over time is notable given that gene family expansion (such as in (Chaw et al. 2019)),

313 increase of transposable elements (Belyayev 2014; Joly-Lopez and Bureau 2018) and WGD events (Hoffman  
314 et al. 2012) are potential triggers of morphological or adaptive key innovations and rapid diversification  
315 (Tank et al. 2015; Soltis and Soltis 2016). These aspects raise further questions regarding the origin and  
316 evolutionary mechanisms giving rise to the diversity of magnoliids (Sauquet and Magallón 2018). The slow  
317 but regular reduction in population size of *Annona muricata* is compatible with the Quaternary contraction of  
318 tropical regions in several parts of the world, and suggests that the soursop could be severely affected by  
319 climate changes, as may other tropical taxa. Contrary to the situation in most crop plants (Eyre-Walker et al.  
320 1998), this reduction did not result from a genetic bottleneck during domestication. However, the very low  
321 heterozygosity in soursops could make future genetic improvement difficult, and will likely require  
322 outcrossing with wild relatives (Zamir 2001).

323 The soursop genome is smaller (657Mb) than *Liriodendron chinense* (1.75Gb) or *Cinnamomum kanehirae*  
324 (824Mb), and it displays the same chromosomes number (7) as that reconstructed for the ancestor of  
325 angiosperms (Badouin et al. 2017). Crucially, both *L. chinense* (19 chromosomes) and *C. kanehirae* (12  
326 chromosomes) show clear signs (Suppl. Fig. 2) of lineage specific whole genome duplication (WGD) and  
327 chromosomal rearrangement events occurring after their branching from their shared MRCA with monocots  
328 or eudicots.

329 The comparative genomic analyses using three magnoliid genomes (*Annona*, *Cinnamomum* and  
330 *Liriodendron*) confirm some of the findings presented in these other studies, but also raise important  
331 analytical considerations in such analyses.

332 Especially, our results suggest that evidence for WGD in other magnoliids represent events that occurred  
333 subsequent, not prior, to their divergence, demonstrating the importance of increased representation in  
334 phylogenomic analyses of older lineages to improve our understanding of the early diversification of  
335 angiosperms. The soursop genome further highlights the limitations of using one species as a representative  
336 for a group as diverse as the magnoliids. Using one species per lineage makes it difficult to distinguish  
337 specific and shared WGD, especially in case of ancient events (Tiley et al. 2018). Ks distributions are useful  
338 to characterize specific WGD events, but for numbers of WGD events should be interpreted with caution  
339 (Tiley et al. 2018). Despite using a more robust method which avoids overfitting of a component-rich  
340 lognormal model to our distribution, we did not find clear evidence in favor of a given number of  
341 components (i.e. WGD events) in *Cinnamomum*.

342 A further emerging concern for phylogenomic analyses is the apparent unfavorable reciprocity between the  
343 number of taxa involved and the number of retrieved orthologs. We show that the number of orthologs used  
344 to perform phylogenomic reconstruction strongly impacts the retrieved topology, with too few genes also  
345 potentially resulting in the reconstruction of erroneous relationships. With the development of new methods  
346 for both sequencing (e.g. Nanopore, Hi-C) and analyses [e.g. paleo-karyotypes (Murat et al. 2014)], it  
347 becomes feasible to get high quality, chromosome-scale assemblies that can address more complex  
348 evolutionary questions. Our current study is limited by the unknown arrangement of scaffolds relative to  
349 each other, hampering our ability to reconstruct a high-resolution genomic comparison of the landscape of  
350 soursop with other magnoliids. Early angiosperms divergences also cannot be fully resolved without taking

351 into account the other basal angiosperms lineages, including the elusive Chloranthales.  
352 Here, we present results based on three magnoliids genomes, a very small part of the clade's diversity. To  
353 improve our understanding of relationships within the group and structural rearrangements at and below the  
354 level of the genome, it will be vital to add representatives from other divergent lineages (e.g. Piperales,  
355 Canelales), as well as other lineages in Magnoliales and Laurales.  
356 The soursop genome, in addition to *Liriodendron* and *Cinnamomum*, will be an exceptional resource not only  
357 for the scientific community but also for breeders (avocado, *Annona* species, pepper, *Magnolia*, etc). Indeed,  
358 genomes give positional information that transcriptomes are unable to provide, allowing more sensitive and  
359 robust delineation of the WGD from tandem duplications (e.g. through synteny graphs) (Tiley et al. 2018), as  
360 well as allowing breeders to use linkage disequilibrium estimation in their programs (Barabaschi et al. 2015).

361

## 362 **Materials & Methods**

### 363 **Plant materials**

364 We identified a mature *Annona muricata* tree in Xishuangbanna Botanical Garden, located in the southern  
365 part of Yunnan province, China (21°55'41.8"N 101°15'31.7"E). The sampled tree was vouchered and tissues  
366 immediately frozen in liquid nitrogen upon collecting until sequencing experiments were performed.

### 367 **Genomic DNA extraction and library preparation**

368 The libraries were subjected to the paired-end 150bp sequencing on the Illumina HiSeq 2500 platform.  
369 Approximately 900 millions reads were generated from Illumina libraries with different inserts sizes (250bp,  
370 350bp) to provide a first estimation of the genome size, GC content, heterozygosity rate and repeat content.  
371 Genomic DNA was isolated from the leaves of *A. muricata*. For a 20-kb insert size library, at least 20 µg of  
372 sheared DNA was required. SMRTbell template preparation involved DNA concentration, damage repair,  
373 end repair, ligation of hairpin adapters, and template purification, and used AMPure PB Magnetic Beads.  
374 Finally, the sequencing primer was annealed and sequencing polymerase was bound to SMRTbell template.  
375 The instructions specified as calculated by the RS Remote software were followed. We carried out 20-kb  
376 single-molecule real-time DNA sequencing by PacBio and sequenced the DNA library on the PacBio RS II  
377 platform, yielding about 37Gb PacBio data (read quality  $\geq 0.80$ , mean read length  $\geq 7$  Kb)

### 378 **10X Genomics and Bionano library preparation and sequencing**

379 DNA sample preparation, indexing, and barcoding were done using the GemCode Instrument from 10X  
380 Genomics. About 0.7 ng input DNA with 50 kb length was used for GEM reaction procedure during PCR,  
381 and 16-bp barcodes were introduced into droplets. Then, the droplets were fractured following the purifying  
382 of the intermediate DNA library. Next, we sheared DNA into 500 bp for constructing libraries, which were  
383 finally sequenced on the Illumina HiSeq X.

384 This sequencing strategy provided sequencing depths of 163X, 46X, 225X and 120X for Illumina, PacBio,  
385 10X Genomics and Bionano libraries sequencing, respectively.

### 386 **RNA extraction and library preparation**

387 Total RNA was extracted using the RNAPrep Pure Plant Kit and genomic DNA contamination was removed  
388 using RNase-Free DNase I (both from Tiangen). The integrity of RNA was evaluated on a 1.0% agarose gel

389 stained with ethidium bromide (EB), and its quality and quantity were assessed using a NanoPhotometer  
390 spectrophotometer (IMPLEN) and an Agilent 2100 Bioanalyzer (Agilent Technologies). As the RNA  
391 integrity number (RIN) was greater than 7.0 for all samples, they were used in cDNA library construction  
392 and Illumina sequencing, which was completed by Beijing Novogene Bioinformatics Technology Co., Ltd.  
393 The cDNA library was constructed using the NEBNext Ultra RNA Library Prep Kit for Illumina (NEB) and  
394 3 µg RNA per sample, following the manufacturer's recommendations. The PCR products obtained were  
395 purified (AMPure XP system) and library quality was assessed on the Agilent Bioanalyzer 2100 system.  
396 Library preparations were sequenced on an Illumina HiSeq 2000 platform, generating 100-bp paired-end  
397 reads.

### 398 **Estimation of genome size and heterozygosity**

399 The k-mer frequency analysis, also known as k-mer spectra, is an efficient assembly-independent method for  
400 accurate estimation of genomic characteristics (genome size, repeat content, heterozygous rate). The k-mers  
401 refer to all the possible subsequences (of length k) from a read. We estimated the genome size based on the  
402 17-mer frequency of Illumina short reads using the formula: genome size = (total number of 17-mer)/  
403 (position of peak depth). We obtained an estimate of 799.11 Mb.

### 404 **Genome assembly**

405 We used ALLPATHS-LG (Gnerre et al. 2011) and obtained a preliminary assembly of *A. muricata* with a  
406 scaffold N50 size of 19,908 kb and corresponding contig N50 size of 8.26 Kb. We used PBjelly (English et  
407 al. 2012) to fill gaps with PacBio data. The options were “<blasr>-minMatch 8 -sdpTupleSize 8  
408 -minPctIdentity 75 -bestn 1 -nCandidates 10 -maxScore -500 -nproc 10 -noSplitSubreads</blasr>” for the  
409 protocol.xml file. Then, we used Pilon (Walker et al. 2014) with default settings to correct assembled errors.  
410 For the input BAM file, we used BWA to align all the Illumina short reads to the assembly and SAMtools to  
411 sort and index the BAM file.

412 We used BWA mem to align the 10X Genomics data to the filled gaps assembly using default settings. Then,  
413 we used fragScaff (<https://sourceforge.net/projects/fragscaff/>) for scaffolding.

### 414 **Transcriptome assembly**

415 RNA sequencing (RNA-Seq) libraries were constructed using the NEBNext mRNA Library Prep Master Mix  
416 Set for Illumina following the manufacturer's instructions. The libraries were subjected to paired-end 150 bp  
417 sequencing on the Illumina HiSeq 2000 platform. Raw reads were first filtered by removing those containing  
418 undetermined bases ('N') or excessive numbers of low-quality positions (>10 positions with quality scores  
419 <10 ). Then the high-quality reads were mapped to the U+0078<sup>2</sup>*A. muricata* genome using Tophat (v2.0.9)66  
420 with the parameters of '-p 10 -N 3 --read-edit-dist 3 -m 1 -r 0 --coverage-search --microexon-search'.

### 421 **Genome annotation**

422 Transposable elements in the genome assembly were identified both at the DNA and protein level. We used  
423 RepeatModeler to develop *de novo* transposable element library. RepeatMasker (Smit et al. 2017) was  
424 applied for DNA-level identification using Repbase and *de novo* transposable element library. At protein  
425 level, RepeatProteinMask was used to conduct WU-BLASTX searches against the transposable element  
426 protein database. Overlapping transposable elements belonging to the same type of repeats were integrated

427 together.

428 Protein coding genes were predicted through combination of homology-based prediction, *de novo* predictions  
429 and transcriptome based predictions:

430 - Structural annotation of protein coding genes and protein domains was performed by aligning the protein  
431 sequences to the soursop genome by using TblastN with an E-value cutoff by 1E-5. The blast hits were  
432 conjoined by solar. For each blast hit, Genewise was used to predict the exact gene structure in the  
433 corresponding genomic regions.

434 - Five *ab initio* gene prediction programs, including Augustus (<http://bioinf.uni-greifswald.de/augustus/>),  
435 Genscan (<http://genes.mit.edu/GENSCAN.html>), GlimmerHMM  
436 (<ftp://ccb.jhu.edu/pub/software/glimmerhmm>), Geneid (<http://genome.crg.es/geneid.html>) and SNAP  
437 (<https://github.com/KorfLab/SNAP>), were used to predict coding genes on the repeat-masked genomes.

438 - Finally, RNA-seq data were mapped to genome using Tophat (Kim et al. 2013), and then cufflinks  
439 (<http://cufflinks.cbc.umd.edu/>) was used to assemble transcripts to gene models.

440 All gene models predicted from the above three approaches were combined by EVIDENCEModeler (EVM)  
441 (Haas et al. 2008) into a non-redundant set of gene structures. Then we filtered out low quality gene models:  
442 (1) coding region lengths of  $\leq 150$  bp, (2) supported only by *ab initio* methods and with FPKM $<1$ .

443 Functional annotation of protein coding genes was evaluated by BLASTP (evalue1E-05) instead of two  
444 integrated protein sequence databases – SwissProt and TrEMBL. The annotation information of the best  
445 BLAST hit, which is derived from database, was transferred to our gene set. Protein domains were annotated  
446 by searching InterPro (<https://www.ebi.ac.uk/interpro/>) and Pfam (<https://pfam.xfam.org/>) databases, using  
447 *InterProScan* and *Hmmer*, respectively. Gene Ontology (GO) terms for each gene were obtained from the  
448 corresponding InterPro or Pfam entry. The pathways, in which the gene might be involved, were assigned by  
449 blast against the KEGG database (<https://www.genome.jp/kegg/>), with an E-value cutoff of 1E-05.

450 The tRNA genes were identified by tRNAscan-SE (Lowe and Eddy 1996) with eukaryote parameters. The  
451 rRNA fragments were predicted by aligning to *Arabidopsis thaliana* and *Oryza sativa* template rRNA  
452 sequences using BlastN at E-value of 1E-10. The miRNA and snRNA genes were predicted using  
453 INFERNAL by searching against the Rfam database (<http://rfam.xfam.org/>).

#### 454 **Population size changes inference**

455 We used PSMC (Liu and Hansen 2017) to infer the variation in population size of the soursop based on the  
456 observed heterozygosity in the diploid genome. As PSMC was shown to performed reliably for scaffolds  
457  $>100$ kb, we removed shorter scaffolds from the assembly. 312 scaffolds  $> 100$ kb were kept, totalizing 646.64  
458 Mb (98.46 percent of the total assembly). We assume a generation time of 15 years (Collevatti et al.  
459 2014) and a per-generation mutation rate of  $7 \times 10^{-9}$ . PSMC was otherwise conducted using default  
460 parameters.

#### 461 **Coalescence phylogenetic analyses**

462 We selected the following 12 representative plant species (Supplementary Table XX) : *C. canephora*, *H.*  
463 *annuus*, *A. hypochondriacus* (in Super-Asterids), *V. vinifera*, *A. thaliana*, *Q. robur* (in Rosids), *M.acuminata*,  
464 *O. sativa* (Monocots), *N. nucifera* and *A. coerulea*, plus two recently published magnoliids genomes



465 (*Cinnamomum kanehirae* and *Liriodendron chinense*). We reconstructed phylogenetic trees using the same  
466 method with three datasets :  
467 - orthologs identified in the 12 representative plant species, maximizing the number of species ;  
468 - orthologs identified in the quartet (*Annona muricata*, *Arabidopsis thaliana*, *Amborella trichopoda* and  
469 *Oryza sativa*), maximising the number of loci ;  
470 - orthologs identified in the previous quartet, plus *Cinnamomum kanehirae* and *Liriodendron chinense*,  
471 maximizing the magnoliids representation ;  
472 For each dataset, we used OrthoMCL (Li et al. 2003) to define gene family clusters among different species.  
473 An all-against-all BLASTP was first applied to determine the similarities between genes in all genomes at  
474 the E-value threshold of  $1e-7$ . Then the Markov clustering (MCL) algorithm implemented in OrthoMCL was  
475 used to group orthologs and paralogs from all input species with an inflation value (-I) of 1.5. The sequences  
476 from each family containing one single ortholog for all species were aligned using mafft and a phylogenetic  
477 reconstructed using PhyML (Guindon et al. 2010) with a GTR+I+G model with 4 substitution categories and  
478 100 bootstrap replicates. The species trees were then built for each dataset with MP-est, NJ-st and STAR as  
479 implemented in the Species Tree Webserver (Shaw et al. 2013) and ASTRAL-III (Zhang et al. 2018) using  
480 default parameters.

#### 481 **Gene family expansion analysis**

482 The species tree from the dataset maximizing the magnoliids representation was used to analyze the Gene  
483 family expansion/contraction along the branch of the species tree with CAFE (De Bie et al. 2006), with  
484 correction for potential assembly and annotations mistakes. We dated the ASTRAL-III tree with treePL  
485 (Smith and O'Meara 2012) and several nodes calibrations (root max age = 200Ma (Massoni et al. 2015);  
486 divergence Monocots/Eudicots min-max age : 160-195Ma (Foster et al. 2016); divergence  
487 Magnoliales/Laurales min-max age : 121-162 Ma (Massoni et al. 2015); Magnoliales crown min-max age :  
488 114-146Ma (Massoni et al. 2015)). One representative sequence from each family was used for downstream  
489 annotation as above. GO-terms were retrieved for annotated in expanded families using PANTHER  
490 (<http://www.pantherdb.org/>).

#### 491 **Identification of WGD events in *A. muricata* and during early angiosperm divergence**

492 KS-based age distributions were constructed using wgd (Zwaenepoel and Van de Peer 2019). In brief, the  
493 paranome of magnoliids and one-vs-one orthologs comparisons were constructed by performing all-against-  
494 all protein sequence similarity searches using BLASTP with an *E* value cutoff of  $1 \times 10^{-10}$ , after which gene  
495 families were built with mcl (Altschul et al. 1997; Stijn Marinus van Dongen 2000). Each gene family was  
496 aligned using mafft (Kato and Standley 2013) and KS estimates for all pairwise comparisons within a gene  
497 family were obtained through maximum likelihood estimation using CODEML (Kohlhase 2006) of the  
498 PAML package (Yang 2007). Gene families were then subdivided into subfamilies for which KS estimates  
499 between members did not exceed a value of 5. To correct for the redundancy of KS values (a gene family of  
500  $n$  members produces  $n(n-1)/2$  pairwise KS estimates for  $n-1$  retained duplication events), a phylogenetic  
501 tree was constructed for each subfamily using FastTree (Price et al. 2009) under default settings. For each  
502 duplication node in the resulting phylogenetic tree, all  $m$  KS estimates between the two child clades were

503 added to the *KS* distribution with a weight of  $1/m$  (where  $m$  is the number of *KS* estimates for a duplication  
504 event), so that the weights of all *KS* estimates for a single duplication event summed to one.

### 505 **Phylogenomic incongruence analyses**

506 To investigate the patterns of incongruence among loci in reconstructing the early history of angiosperms, we  
507 analyzed individually each of the 689 orthologous genes found in 12 selected angiosperms. For each gene,  
508 orthologous sequences were aligned as described above, then PhyML was used with the WAG model and  
509 SH-like confidence estimation with *A. trichopoda* set as outgroup. The resulting trees were sorted using the  
510 sortTrees function in R to identify trees with a given topology at a specific node [i.e. Amur+Eu dicotyledons,  
511 Amur+Monocotyledons or Amur,(Eudicotyledons+Monocotyledons)], according to the support at this node.  
512 We then extracted the GO-terms annotations for the genes supporting each topology with each support using  
513 Panther (Mi et al. 2018) and custom scripts.

514 In order to increase the number of orthologous sequences used and to assess the influence of the data matrix  
515 configuration (“less genes x more species” vs “more genes x less species”), we generated orthologous  
516 sequences set for a restricted number of species representative of the major clades in angiosperms (namely  
517 Magnoliids – *A. muricata*, Monocots – *O. sativa*, Dicots – *A. thaliana*, and *A. trichopoda*). This set of genes  
518 contained 2426 orthologous coding genes found in the 4 species in single copies, and was analysis in the  
519 same way than describe above for the 689 loci dataset.

520 We then explore the genomic landscape of incongruence loci by comparing the scaffold containing genes  
521 supporting a given topology for the second dataset. Heatmaps for several parameters (i.e. the number of  
522 genes, their density and their relative abundance compared to the background (the entire set of orthologs)  
523 were generated using the heatmap.2 function from the gplots package in R (R Development Core Team  
524 2010).

525 A linear regression (“lm” function in R) was used to confirm the portion of genes supporting a given  
526 topology was independent of the scaffold length (p-values > 0.2 for each comparison).

527

### 528 **Acknowledgements**

529 Genome sequencing, assembly and annotation were conducted by the Novogene Bioinformatics Institute,  
530 Beijing, China; mutual contract No. NHT161060. This work was supported by funding through the Guangxi  
531 Province One Hundred Talent program and Guangxi University to JSS, and the China Postdoctoral Science  
532 Foundation (grant number 2015M582481 and 2016T90822) to DDH. The basis for this manuscript was laid  
533 down during the 2015 dialogue seminar on Annonaceae under the Joint Scientific Thematic Research  
534 Programme (JSTP) funded by the Netherlands Organisation for Scientific Research and the Chinese  
535 Academy of Sciences (grant number 045.011.020). TLPC was supported by the Agence Nationale de la  
536 Recherche (grant AFRODYN: ANR-15- CE02- 0002-01) and acknowledges the IRD itrop South Green  
537 Platform at IRD montpellier for providing HPC resources that have contributed to the research results  
538 reported within this paper. MDP is supported by the Heisenberg programme of the Deutsche  
539 Forschungsgemeinschaft (PI 1169/3-1). The authors report no conflict of interests.

540 **Code availability.** All custom scripts used are available from the corresponding author upon request.

541

542 **Data availability**

543 Genome sequences and whole-genome assembly of *A. muricata* and whole transcriptomes have been  
544 submitted to the National Center for Biotechnology Information (NCBI) database under BioProject  
545 PRJEB30626 (pending). All other data are available from the corresponding authors upon reasonable request.

546

547

548

549

550 **References**

551 Altschul SF, Madden TL, Schäffer AA, Zhang J, Zhang Z, Miller W, Lipman DJ. 1997. Gapped BLAST and  
552 PSI-BLAST: A new generation of protein database search programs. *Nucleic Acids Res.* 25:3389–3402.

553 Badouin H, Gouzy J, Grassa CJ, Murat F, Staton SE, Cottret L, Lelandais-Brière C, Owens GL, Carrère S,  
554 Mayjonade B, et al. 2017. The sunflower genome provides insights into oil metabolism, flowering and  
555 Asterid evolution. *Nature* 546:148–152.

556 Barabaschi D, Tondelli A, Desiderio F, Volante A, Vaccino P, Valè G, Cattivelli L. 2015. Next generation  
557 breeding. *Plant Sci.* 242:3–13.

558 Bell CD, Soltis DE, Soltis PS. 2010. The age and diversification of the angiosperms re-revisited. *Am. J. Bot.*  
559 97:1296–1303.

560 Belyayev A. 2014. Bursts of transposable elements as an evolutionary driving force. *J. Evol. Biol.* 27:2573–  
561 2584.

562 De Bie T, Cristianini N, Demuth JP, Hahn MW. 2006. CAFE: A computational tool for the study of gene  
563 family evolution. *Bioinformatics* 22:1269–1271.

564 Chatrou LW, Erkens RHJ, Richardson JE, Saunders RMK, Fay MF. 2012. The natural history of  
565 Annonaceae. *Bot. J. Linn. Soc.* 169:1–4.

566 Chaw SM, Liu YC, Wu YW, Wang HY, Lin CYI, Wu CS, Ke HM, Chang LY, Hsu CY, Yang HT, et al. 2019.  
567 Stout camphor tree genome fills gaps in understanding of flowering plant genome evolution. *Nat.*  
568 *Plants* 5:63.

569 Chen J, Hao Z, Guang X, Zhao C, Wang P, Xue L, Zhu Qihui, Yang Linfeng, Sheng Y, Zhou Y, et al. 2019.  
570 *Liriodendron* genome sheds light on angiosperm phylogeny and species–pair differentiation.  
571 *Nat. Plants* 5:18.

572 Collevatti RG, Telles MPC, Lima JS, Gouveia FO, Soares TN. 2014. Contrasting spatial genetic structure in  
573 *Annona crassiflora* populations from fragmented and pristine savannas. *Plant Syst. Evol.* 300:1719–  
574 1727.

575 Doebley JF, Gaut BS, Smith BD. 2006. The Molecular Genetics of Crop Domestication. *Cell* 127:1309–

- 576 1321.
- 577 Edwards S V. 2009. Is a new and general theory of molecular systematics emerging? *Evolution* (N. Y.)  
578 [Internet] 63:1–19. Available from:  
579 [https://dash.harvard.edu/bitstream/handle/1/26514972/Edwards\\_2009\\_Commentary\\_accepted\\_version.](https://dash.harvard.edu/bitstream/handle/1/26514972/Edwards_2009_Commentary_accepted_version.pdf?sequence=1)  
580 pdf?sequence=1
- 581 Edwards S V., Xi Z, Janke A, Faircloth BC, McCormack JE, Glenn TC, Zhong B, Wu S, Lemmon EM,  
582 Lemmon AR, et al. 2016. Implementing and testing the multispecies coalescent model: A valuable  
583 paradigm for phylogenomics. *Mol. Phylogenet. Evol.* [Internet] 94:447–462. Available from:  
584 <https://www.sciencedirect.com/science/article/pii/S1055790315003309>
- 585 English AC, Richards S, Han Y, Wang M, Vee V, Qu J, Qin X, Muzny DM, Reid JG, Worley KC, et al. 2012.  
586 Mind the Gap: Upgrading Genomes with Pacific Biosciences RS Long-Read Sequencing Technology.  
587 *PLoS One* [Internet] 7:e47768. Available from: <https://doi.org/10.1371/journal.pone.0047768>
- 588 Eyre-Walker A, Gaut RL, Hilton H, Feldman DL, Gaut BS. 1998. Investigation of the bottleneck leading to  
589 the domestication of maize. *Proc. Natl. Acad. Sci. U. S. A.* 95:4441–4446.
- 590 Foster CSP, Sauquet H, Van Der Merwe M, McPherson H, Rossetto M, Ho SYW. 2016. Evaluating the  
591 impact of genomic data and priors on Bayesian estimates of the angiosperm evolutionary timescale.  
592 *Syst. Biol.* 66:338–351.
- 593 Freitas L, Mello B, Schrago CG. 2018. Multispecies coalescent analysis confirms standing phylogenetic  
594 instability in Hexapoda. *J. Evol. Biol.* [Internet] 31:1623–1631. Available from:  
595 <http://doi.wiley.com/10.1111/jeb.13355>
- 596 Gentry AH. 1993. *Four neotropical rainforests*. New Haven: Yale University Press
- 597 Gnerre S, MacCallum I, Przybylski D, Ribeiro FJ, Burton JN, Walker BJ, Sharpe T, Hall G, Shea TP, Sykes  
598 S, et al. 2011. High-quality draft assemblies of mammalian genomes from massively parallel sequence  
599 data. *Proc. Natl. Acad. Sci.* 108:1513–1518.
- 600 Guindon S, Dufayard JF, Lefort V, Anisimova M, Hordijk W, Gascuel O. 2010. New algorithms and methods  
601 to estimate maximum-likelihood phylogenies: Assessing the performance of PhyML 3.0. *Syst. Biol.*  
602 59:307–321.
- 603 Haas BJ, Salzberg SL, Zhu W, Pertea M, Allen JE, Orvis J, White O, Robin CR, Wortman JR. 2008.  
604 Automated eukaryotic gene structure annotation using EVIDENCEModeler and the Program to Assemble  
605 Spliced Alignments. *Genome Biol.* 9:1.
- 606 Hoffman FG, Opazo JC, Storz JF. 2012. Whole-genome duplications spurred the functional diversification of  
607 the globin gene superfamily in vertebrates. *Mol. Biol. Evol.* 29:303–312.
- 608 Initiative A genome. 2000. Analysis of the genome sequence of the flowering plant *Arabidopsis thaliana*.  
609 *Nature* 408:796.

- 610 Jarvis ED, Mirarab S, Aberer AJ, Li B, Houde P, Li C, Ho SYW, Faircloth BC, Nabholz B, Howard JT, et al.  
611 2014. Whole-genome analyses resolve early branches in the tree of life of modern birds. *Science*  
612 (80-. ). 346:1320–1331.
- 613 Joly-Lopez Z, Bureau TE. 2018. Exaptation of transposable element coding sequences. *Curr. Opin. Genet.*  
614 *Dev.* [Internet] 49:34–42. Available from:  
615 <https://www.sciencedirect.com/science/article/pii/S0959437X17301582>
- 616 Katoh K, Standley DM. 2013. MAFFT multiple sequence alignment software version 7: improvements in  
617 performance and usability. *Mol. Biol. Evol.* [Internet] 30:772–780. Available from:  
618 [http://www.pubmedcentral.nih.gov/articlerender.fcgi?](http://www.pubmedcentral.nih.gov/articlerender.fcgi?artid=3603318&tool=pmcentrez&rendertype=abstract)  
619 [artid=3603318&tool=pmcentrez&rendertype=abstract](http://www.pubmedcentral.nih.gov/articlerender.fcgi?artid=3603318&tool=pmcentrez&rendertype=abstract)
- 620 Kim D, Pertea G, Trapnell C, Pimentel H, Kelley R, Salzberg SL. 2013. TopHat2: accurate alignment of  
621 transcriptomes in the presence of insertions, deletions and gene fusions. *Genome Biol.* 14:R36.
- 622 Kohlhase M. 2006. CodeML: an open markup format the content and presentation of program code.  
623 Available from: <https://svn.omdoc.org/repos/codeml/doc/spec/codeml>
- 624 Li L, Stoeckert CJ, Roos DS. 2003. OrthoMCL: Identification of ortholog groups for eukaryotic genomes.  
625 *Genome Res.* 13:2178–2189.
- 626 Liu S, Hansen MM. 2017. PSMC (pairwise sequentially Markovian coalescent) analysis of RAD (restriction  
627 site associated DNA) sequencing data. *Mol. Ecol. Resour.* 17:631–641.
- 628 Lowe TM, Eddy SR. 1996. TRNAscan-SE: A program for improved detection of transfer RNA genes in  
629 genomic sequence. *Nucleic Acids Res.* 25:955–964.
- 630 Magallón S, Gómez-Acevedo S, Sánchez-Reyes LL, Hernández-Hernández T. 2015. A metacalibrated time-  
631 tree documents the early rise of flowering plant phylogenetic diversity. *New Phytol.* [Internet] 207:437–  
632 453. Available from: <http://doi.wiley.com/10.1111/nph.13264>
- 633 Massoni J, Couvreur TLP, Sauquet H. 2015. Five major shifts of diversification through the long  
634 evolutionary history of Magnoliidae (angiosperms) Phylogenetics and phylogeography. *BMC Evol.*  
635 *Biol.* 15:49.
- 636 Massoni J, Forest F, Sauquet H. 2014. Increased sampling of both genes and taxa improves resolution of  
637 phylogenetic relationships within Magnoliidae, a large and early-diverging clade of angiosperms. *Mol.*  
638 *Phylogenet. Evol.* 70:84–93.
- 639 Mi H, Muruganujan A, Ebert D, Huang X, Thomas PD. 2018. PANTHER version 14: more genomes, a new  
640 PANTHER GO-slim and improvements in enrichment analysis tools. *Nucleic Acids Res.* 47:D419–  
641 D426.
- 642 Moore MJ, Hassan N, Gitzendanner MA, Bruenn RA, Croley M, Vandeventer A, Horn JW, Dhingra A,  
643 Brockington SF, Latvis M, et al. 2011. Phylogenetic Analysis of the Plastid Inverted Repeat for 244



- 644 Species: Insights into Deeper-Level Angiosperm Relationships from a Long, Slowly Evolving  
645 Sequence Region. *Int. J. Plant Sci.* 172:541–558.
- 646 Moore MJ, Soltis DE, Burleigh JG, Bell CD, Soltis PS, Bell CD, Burleigh JG, Soltis DE. 2010. Phylogenetic  
647 analysis of 83 plastid genes further resolves the early diversification of eudicots. *Proc. Natl. Acad. Sci.*  
648 [Internet] 107:4623–4628. Available from: [http://www.ncbi.nlm.nih.gov/entrez/query.fcgi?](http://www.ncbi.nlm.nih.gov/entrez/query.fcgi?cmd=Retrieve&db=PubMed&dopt=Citation&list_uids=20176954)  
649 [cmd=Retrieve&db=PubMed&dopt=Citation&list\\_uids=20176954](http://www.ncbi.nlm.nih.gov/entrez/query.fcgi?cmd=Retrieve&db=PubMed&dopt=Citation&list_uids=20176954)
- 650 Murat F, Armero A, Pont C, Klopp C, Salse J. 2017. Reconstructing the genome of the most recent common  
651 ancestor of flowering plants. *Nat. Genet.* 49:490.
- 652 Murat F, Pont C, Salse J. 2014. Paleogenomics in Triticeae for translational research. *Curr. Plant Biol.* 1:34–  
653 39.
- 654 Nickrent DL, Soltis DE. 2006. A Comparison of Angiosperm Phylogenies from Nuclear 18S rDNA and rbcL  
655 Sequences. *Ann. Missouri Bot. Gard.* 82:208.
- 656 Oliver KR, McComb JA, Greene WK. 2013. Transposable elements: Powerful contributors to angiosperm  
657 evolution and diversity. *Genome Biol. Evol.* [Internet] 5:1886–1901. Available from:  
658 <https://academic.oup.com/gbe/article-lookup/doi/10.1093/gbe/evt141>
- 659 Price MN, Dehal PS, Arkin AP. 2009. Fasttree: Computing large minimum evolution trees with profiles  
660 instead of a distance matrix. *Mol. Biol. Evol.* 26:1641–1650.
- 661 Punyasena SW, Eshel G, McElwain JC. 2008. The influence of climate on the spatial patterning of  
662 Neotropical plant families. *J. Biogeogr.* 35:117.
- 663 Qiu YL, Li L, Wang B, Xue JY, Hendry TA, Li RQ, Brown JW, Liu Y, Hudson GT, Chen ZD. 2010.  
664 Angiosperm phylogeny inferred from sequences of four mitochondrial genes. *J. Syst. Evol.* 43:391–  
665 425.
- 666 R Development Core Team. 2010. R: A language and environment for statistical computing. Available from:  
667 <http://www.r-project.org>
- 668 Rainer H, Chatrou LW. 2014. AnnonBase: World species list of Annonaceae.
- 669 Richardson AO, Rice DW, Young GJ, Alverson AJ, Palmer JD. 2013. The “fossilized” mitochondrial genome  
670 of *Liriodendron tulipifera*: Ancestral gene content and order, ancestral editing sites, and extraordinarily  
671 low mutation rate. *BMC Biol.* 11:29.
- 672 Ruhfel BR, Gitzendanner MA, Soltis PS, Soltis DE, Burleigh JG. 2014. From algae to angiosperms—inferring  
673 the phylogeny of green plants (Viridiplantae) from 360 plastid genomes. *BMC Evol. Biol.* [Internet]  
674 14:23. Available from: <http://bmcevolbiol.biomedcentral.com/articles/10.1186/1471-2148-14-23>
- 675 Sauquet H, von Balthazar M, Magallón S, Doyle JA, Endress PK, Bailes EJ, Barroso de Morais E, Bull-  
676 Hereñu K, Carrive L, Chartier M, et al. 2017. The ancestral flower of angiosperms and its early

- 677 diversification. *Nat. Commun.* [Internet] 8:16047. Available from:  
678 <http://www.nature.com/doi/10.1038/ncomms16047>
- 679 Sauquet H, Magallón S. 2018. Key questions and challenges in angiosperm macroevolution. *New Phytol.*  
680 219:1170–1187.
- 681 Shaw TI, Ruan Z, Glenn TC, Liu L. 2013. STRAW: Species TRee Analysis Web server. *Nucleic Acids Res.*  
682 41:W238–W241.
- 683 Smit A, Hubley R, Green P. 2017. RepeatMasker Open-4.0.6 2013-2015 . <http://www.repeatmasker.org>.
- 684 Smith SA, O’Meara BC. 2012. TreePL: Divergence time estimation using penalized likelihood for large  
685 phylogenies. *Bioinformatics* 28:2689–2690.
- 686 Soltis DE, Smith SA, Cellinese N, Wurdack KJ, Tank DC, Brockington SF, Refulio-Rodriguez NF, Walker  
687 JB, Moore MJ, Carlswald BS, et al. 2011. Angiosperm phylogeny: 17 genes, 640 taxa. *Am. J. Bot.*  
688 98:704–730.
- 689 Soltis DE, Soltis PS. 2019. Nuclear genomes of two magnoliids. *Nat. Plants* 5:6.
- 690 Soltis PS, Soltis DE. 2016. Ancient WGD events as drivers of key innovations in angiosperms. *Curr. Opin.*  
691 *Plant Biol.* 30:159–165.
- 692 Song S, Liu L, Edwards S V., Wu S. 2012. Resolving conflict in eutherian mammal phylogeny using  
693 phylogenomics and the multispecies coalescent model. *Proc. Natl. Acad. Sci.* [Internet] 109:14942–  
694 14947. Available from: <http://www.pnas.org/cgi/doi/10.1073/pnas.1211733109>
- 695 Sonké B, Couvreur T. 2014. Tree diversity of the Dja Faunal Reserve, southeastern Cameroon. *Biodivers.*  
696 *Data J.* 2.
- 697 Stijn Marinus van Dongen. 2000. Graph clustering by flow simulation. Dr. Diss.
- 698 Tank DC, Eastman JM, Pennell MW, Soltis PS, Soltis DE, Hinchliff CE, Brown JW, Sessa EB, Harmon LJ.  
699 2015. Nested radiations and the pulse of angiosperm diversification: Increased diversification rates  
700 often follow whole genome duplications. *New Phytol.* 207:454–467.
- 701 Tchouto MGP, Yemefack M, De Boer WF, De Wilde JJFE, Van Der Maesen LJG, Cleef AM. 2006.  
702 Biodiversity hotspots and conservation priorities in the Campo-Ma’an rain forests, Cameroon.  
703 *Biodivers. Conserv.* 15:1219–1252.
- 704 Tiley GP, Barker MS, Burleigh JG. 2018. Assessing the Performance of Ks Plots for Detecting Ancient  
705 Whole Genome Duplications. *Genome Biol. Evol.* 10:2882–2898.
- 706 Walker BJ, Abeel T, Shea T, Priest M, Abouelliel A, Sakthikumar S, Cuomo CA, Zeng Q, Wortman J, Young  
707 SK, et al. 2014. Pilon: An integrated tool for comprehensive microbial variant detection and genome  
708 assembly improvement. *PLoS One* [Internet] 9:e112963. Available from:  
709 <https://doi.org/10.1371/journal.pone.0112963>

- 710 Wickett NJ, Mirarab S, Nguyen N, Warnow T, Carpenter E, Matasci N, Ayyampalayam S, Barker MS,  
711 Burleigh JG, Gitzendanner MA, et al. 2014. Phylotranscriptomic analysis of the origin and early  
712 diversification of land plants. *Proc. Natl. Acad. Sci.* 111:E4859–E4868.
- 713 Yang Z. 2007. PAML 4: Phylogenetic analysis by maximum likelihood. *Mol. Biol. Evol.* 24:1586–1591.
- 714 Zamir D. 2001. Improving plant breeding with exotic genetic libraries. *Nat. Rev. Genet.* 2:983.
- 715 Zeng L, Zhang Q, Sun R, Kong H, Zhang N, Ma H. 2014. Resolution of deep angiosperm phylogeny using  
716 conserved nuclear genes and estimates of early divergence times. *Nat. Commun.* 5:4956.
- 717 Zhang C, Rabiee M, Sayyari E, Mirarab S. 2018. ASTRAL-III: Polynomial time species tree reconstruction  
718 from partially resolved gene trees. *BMC Bioinformatics* 19:153.
- 719 Zhang N, Zeng L, Shan H, Ma H. 2012. Highly conserved low-copy nuclear genes as effective markers for  
720 phylogenetic analyses in angiosperms. *New Phytol.* 195:923–937.
- 721 Zhu Q, Zheng X, Luo J, Gaut BS, Ge S. 2007. Multilocus analysis of nucleotide variation of *Oryza sativa*  
722 and its wild relatives: Severe bottleneck during domestication of rice. *Mol. Biol. Evol.* 24:875–888.
- 723 Zwaenepoel A, Van de Peer Y. 2019. wgd—simple command line tools for the analysis of ancient whole-  
724 genome duplications. *Bioinformatics*.

## 725 **Figures legends**

726 **Figure 1.** Characteristics of the soursop genome and comparative analyses. (a) Effective population size  
727 history inferred by the PSMC method (black line), with one hundred bootstraps shown (red lines). (b)  
728 Distribution of repeat classes in the soursop genome. (c) Divergence distribution of transposable elements in  
729 the genome of *Annona muricata*. Both Kimura substitution level (CpG adjusted) and absolute time are given.  
730 (d) Venn diagram of shared orthologous gene families in *Amborella trichopoda*, *Arabidopsis thaliana*,  
731 *Nelumbo nucifera*, *Oriza sativa* and *Annona muricata*, based on the presence of a representative gene in at  
732 least one of the grouped species. Numbers of clusters are provided in the intersections. (e) Coalescent tree of  
733 the dataset comprising the three magnoliid genomes plus *Amborella* and representative of eudicots  
734 (*Arabidopsis*) and monocots (*Oriza*), based on 1578 orthologs and ASTRAL-III reconstruction. Number of  
735 CAFE-reconstructed gene families variation are shown on the branches (green: expansion ; red : contractions  
736 ; blue : rapid changes). Major annotations experiencing rapid expansion on magnoliids branches are pictured  
737 (see main text for details). (f) Number of families (vertical axis) according to the number of orthologs  
738 (horizontal axis) found in the genome of *Annona* (red), *Liriodendron* (green) and *Cinnamomum* (blue) for  
739 families containing one single ortholog in *Amborella*. (g) Number of families (vertical axis) according to the  
740 number of orthologs (horizontal axis) found in the genome of *Annona* (red) and *Cinnamomum* (blue) for  
741 families containing two orthologs in *Liriodendron*. (h) Number of families (vertical axis) according to the  
742 number of orthologs (horizontal axis) found in the genome of *Annona* (red) and *Liriodendron* (green) for  
743 families containing one single ortholog in both *Amborella* and *Cinnamomum*.

744 **Figure 2.** Incongruence in the phylogenetic signal in the genome of *Annona muricata*. Left: using 689  
745 orthologous loci found in 12 angiosperm species. Right: using 2426 orthologous loci found in 4 species  
746 representative of major clades in angiosperms. For each of the topologies shown in the center, the genes  
747 supporting this topology are sorted by the support of the nodes indicated by stars. The GO-terms associated  
748 with each category of support for each topology are indicated as pie-chart below the histogram. Background  
749 GO-terms distribution for 689 loci (left), 2426 loci (right) and the total annotated genes in *A. muricata*  
750 (center) are shown below the graph. Topology supported by the concatenated 689 loci, coalescent analysis of  
751 689 loci and by the both concatenated and coalescent 2426 loci are highlighted in solid blue, dashed blue and  
752 solid pink, respectively.

753 **Figure 3.** Summary of the supportive evidence for each tested topology. N.S.: non-significant results.

## 754 **Supplementary Figures captions**

755 **Supplementary figure 1.** K-mer distribution analysis for genome size and heterozygosity estimation.

756 **Supplementary Figure 2.** Ks plots for different pairs of comparisons. Histograms show the frequency of the  
757 pairwise comparisons for the given value of Ks, solid curves are densities of the gaussian mixture models,  
758 each dashed curve corresponds to a separate Gaussian component. a. pairwise comparison of *Annona*  
759 *muricata* paralogs ; b. pairwise comparison of *Cinnamomum kanehirae* paralogs ; c. pairwise comparison of  
760 *Liriodendron chinense* paralogs ; d : pairwise comparisons of orthologs between *Annona* and *Cinnamomum* ;  
761 e : pairwise comparisons of orthologs between *Annona* and *Liriodendron* ; f : pairwise comparisons of  
762 orthologs between *Liriodendron* and *Cinnamomum* ; g : pairwise comparisons of orthologs between *Annona*  
763 and *Amborella*. Insets in a,b and c show the Bayesian Information Criterion (BIC, top) and Akaike  
764 Information Criterion (AIC, bottom) according to the number of components considered in the mixture,  
765 arrows indicate the number of components shown on the figure used for fitting the Ks histogram ; red and  
766 blue arrows in b correspond to two and three components used to fit the Ks histogram, respectively. Black  
767 vertical line in d, e and f shows the mode of the *Annona* vs *Liriodendron* Ks values distribution.

768 **Supplementary Figure 3.** Gene prediction support. Number of predicted genes supported by RNA-seq  
769 transcripts (*rna\_0.5*), homology to known proteins (*homolog\_0.5*) or ab initio inference (*denovo\_0.5*).

770 **Supplementary Figure 4.** Coalescent analyses of the 689 loci (a, b, c), 2426 loci (e, f, g, h) and 1578 loci (i,  
771 j, k, l) datasets using MP-est (a, e, i), NJ-st (b, f, j), STAR (c,g,k) and ASTRAL-III (d, h, l) algorithms. MP-  
772 est, NJ-st and STAR analyses were performed using the STRAW webserver 6 . Branch lengths in a and e are  
773 in coalescent units. The branch leading to *Annona muricata* is shown in red. Bootstrap values indicated at  
774 nodes when available.

775 **Supplementary Figure 5.** PCA plot comparing the annotations for genes supporting the SET, SAT and SMT  
776 with different supports (SH-like values <0.50, 0.50<SH-like values <0.70, 0.70<SH-like values <0.95, SH-  
777 like values >0.95) based on GO-term annotations content. PC1 and PC2 are shown. AnnMonocot : SMT ;  
778 Dicots : SET ; basalAnnona : SAT ; background : general annotations content of the soursop genome. a.  
779 Biplot of the datasets, with contribution of the variable to the axes shown as blue arrows. Points colors  
780 according to  $\cos^2$  . b. Colors according to the supported topology. Ellipses indicate 95% confidence interval  
781 for belonging to a group based on annotations content.

782 **Supplementary Figure 6.** Genomic landscape of incongruent phylogenomic signal. Colors according to row  
783 Z-scores (a statistical estimation of the spread of the value for each gene compared to the mean). Each  
784 column represents a given topology ; each line is a scaffold. a: number of gene supporting a given topology  
785 per scaffold ; b: number of gene per base of scaffold ; c: percentage of orthologs strongly supporting a given  
786 topology (relative to the total number of genes supporting this topology, i.e. the ratio “number of genes



787 supporting the topology in the scaffold” / “total number of genes with support >0.70 for this topology in the  
788 dataset”) found in each scaffold ; d: difference between the density of genes supporting a given topology and  
789 the density of orthologous genes in the scaffolds (aka the background).

790 **Supplementary Figure 7.** Plots of the number of genes supporting a given topology relative to the total  
791 number of genes in the scaffold (i.e. the background repartition of the 2426 orthologous loci) showing a  
792 higher proportion of genes supporting a basal Annona hypothesis (Main panel). Colors of linear regression  
793 and their slope p-values according according to the supported hypothesis green: genes supporting SAT ; red:  
794 genes supporting SET ; blue: genes supporting SMT. Left panel : density plot of the relative number of genes  
795 supporting a given topology. Bottom panel : density plot of the scaffold lengths. Inset: boxplot of the same  
796 data than the main panel without considering the scaffold length.

797

798 **Supplementary Tables captions**

799 **Supplementary Table 1.** Overview of the sequences generated.

800 **Supplementary Table 2.** Assembly statistics.

801 **Supplementary Table 3.** To evaluate the quality of the genome assembly, we mapped reads from short insert  
802 size libraries back to the scaffolds by using BWA (<http://bio-bwa.sourceforge.net/>). The sequencing depth  
803 distribution follows a Poisson distribution, which indicates the uniformity of the genome sequencing process.

804 **Supplementary Table 4.** Classification of TEs content.

805 **Supplementary Table 5.** Characteristics of the annotated genes in 10 angiosperms species.

806 **Supplementary Table 6.** Overview of annotated genes per database.

807 **Supplementary Table 7.** CEGMA and BUSCO assessments of the genes annotations.

808 **Supplementary Table 8.** Number of trees supporting each topology for the 12 and 4 species dataset,  
809 respectively. Trees are classified according to the support (SH-like values) of the node supporting the  
810 topology.

811 **Supplementary Table 9.** Identification of functional biases among orthologous sequences in the 4 species  
812 dataset. Numbers of genes attributed to given GO-term among the orthologs supporting different topologies.

813 **Supplementary Table 10.** Statistics of the distribution of orthologs across scaffolds. Density is expressed in  
814 number of orthologs per base. The background is defined as the total dataset (2426 loci in 181 scaffolds).  
815 Differential density is expressed as the ratio of the density of genes supporting a given topology over the  
816 background density of orthologs.

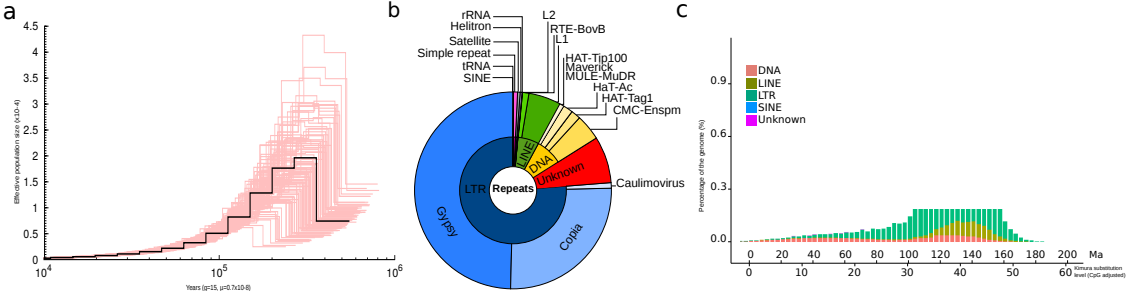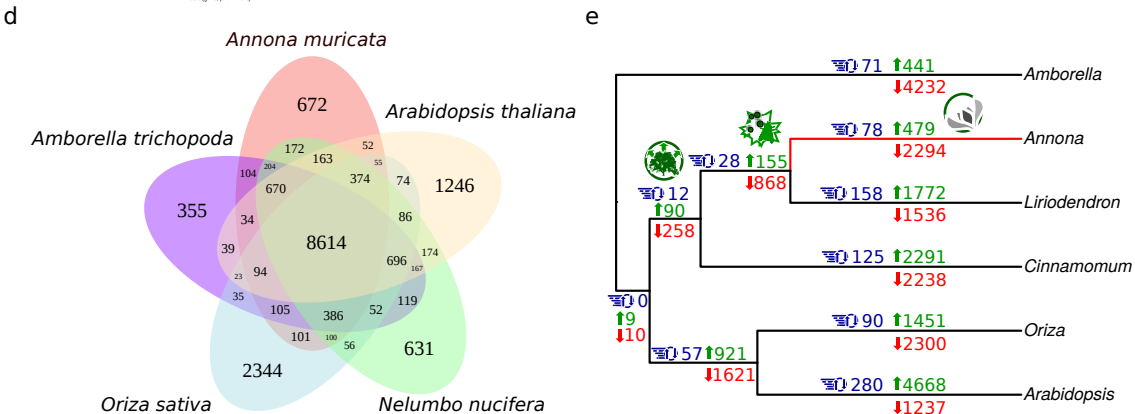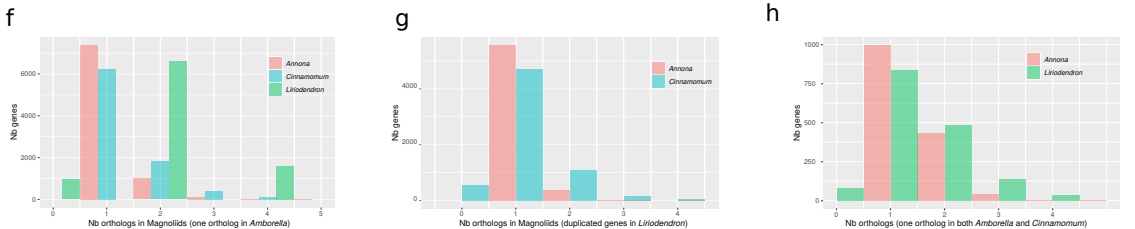

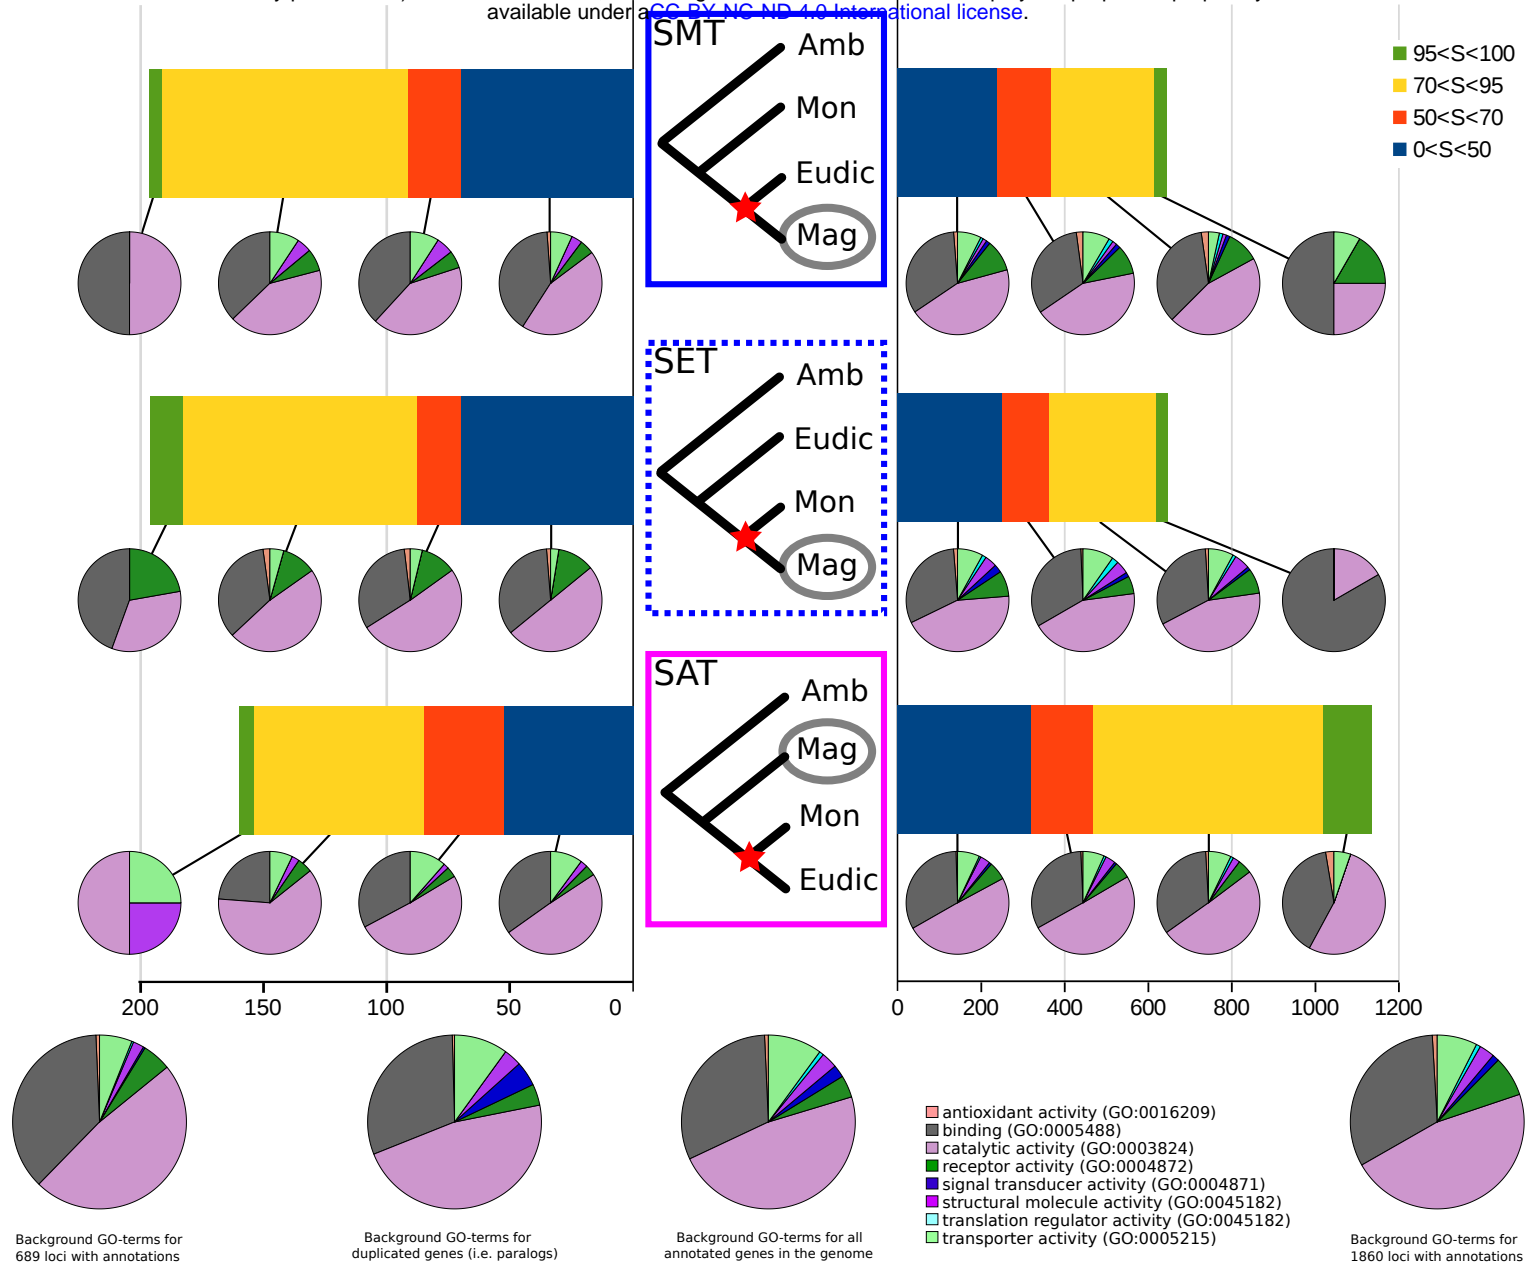

Concatenated  
analyses

Coalescent  
analyses

Nb of loci  
supporting  
the topology

Scaffolds architecture

689 2426  
loci loci

689 1578 2426  
loci loci loci

689 2426  
loci loci

% of genes supporting a topology    density of genes supporting a topology    deviation from background

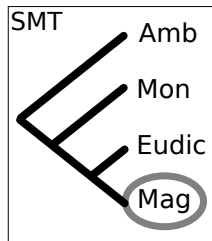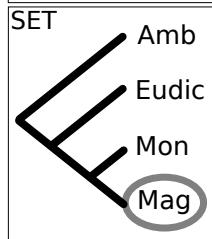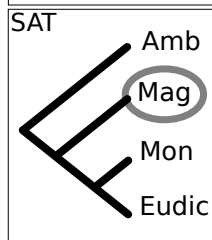

|   |   |   |   |   |      |   |   |  |   |
|---|---|---|---|---|------|---|---|--|---|
| ✓ |   |   |   |   | N.S. |   |   |  |   |
|   |   | ✓ |   |   | N.S. |   | ✓ |  |   |
|   | ✓ |   | ✓ | ✓ |      | ✓ | ✓ |  | ✓ |
